# Supplementary material
Source: HighWire-hosted journal article supplement (https://erj.ersjournals.com/content/52/4/1800884)
Supplement: inline-supplementary-material-2 [file inline-supplementary-material-2.pdf]

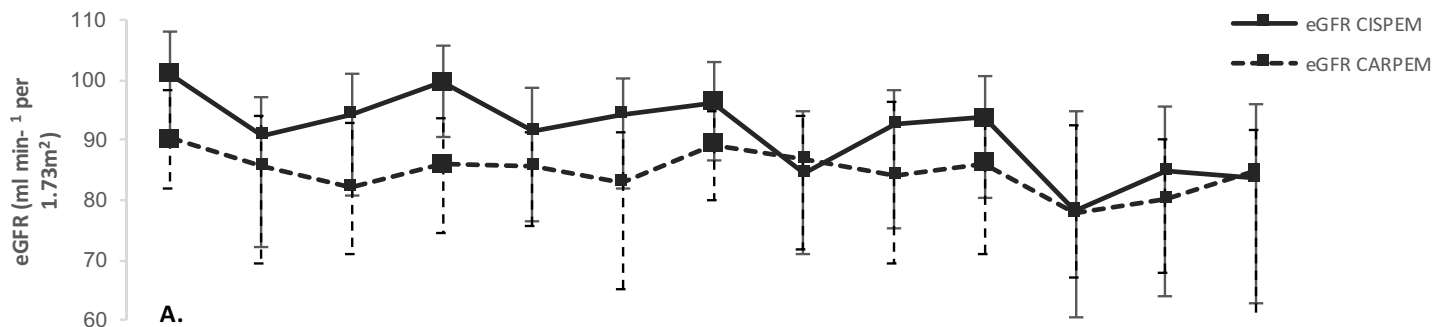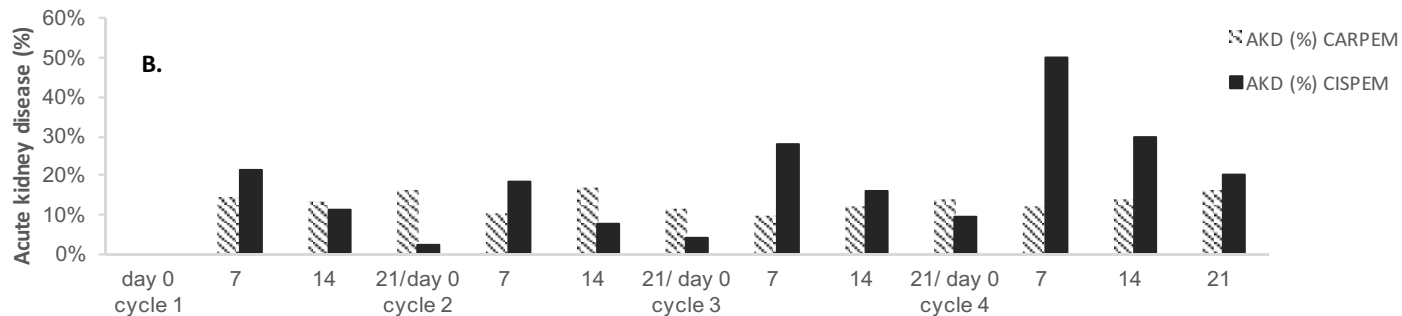

**Number at risk**

|        |    |    |    |    |
|--------|----|----|----|----|
| CISPEM | 97 | 83 | 67 | 53 |
| CARPEM | 52 | 43 | 34 | 29 |

**Treatment discontinuation**

|                       |    |    |    |
|-----------------------|----|----|----|
| PD                    | 7  | 15 | 4  |
| toxicity              | 16 | 9  | 4  |
| sequential RT/surgery |    | 1  | 11 |
